# Supplementary material
Source: PubMed Central journal article supplement (PMC3685392)
Supplement: Supp_Data.pdf [file Supp_Data.pdf]

## Supplementary Data

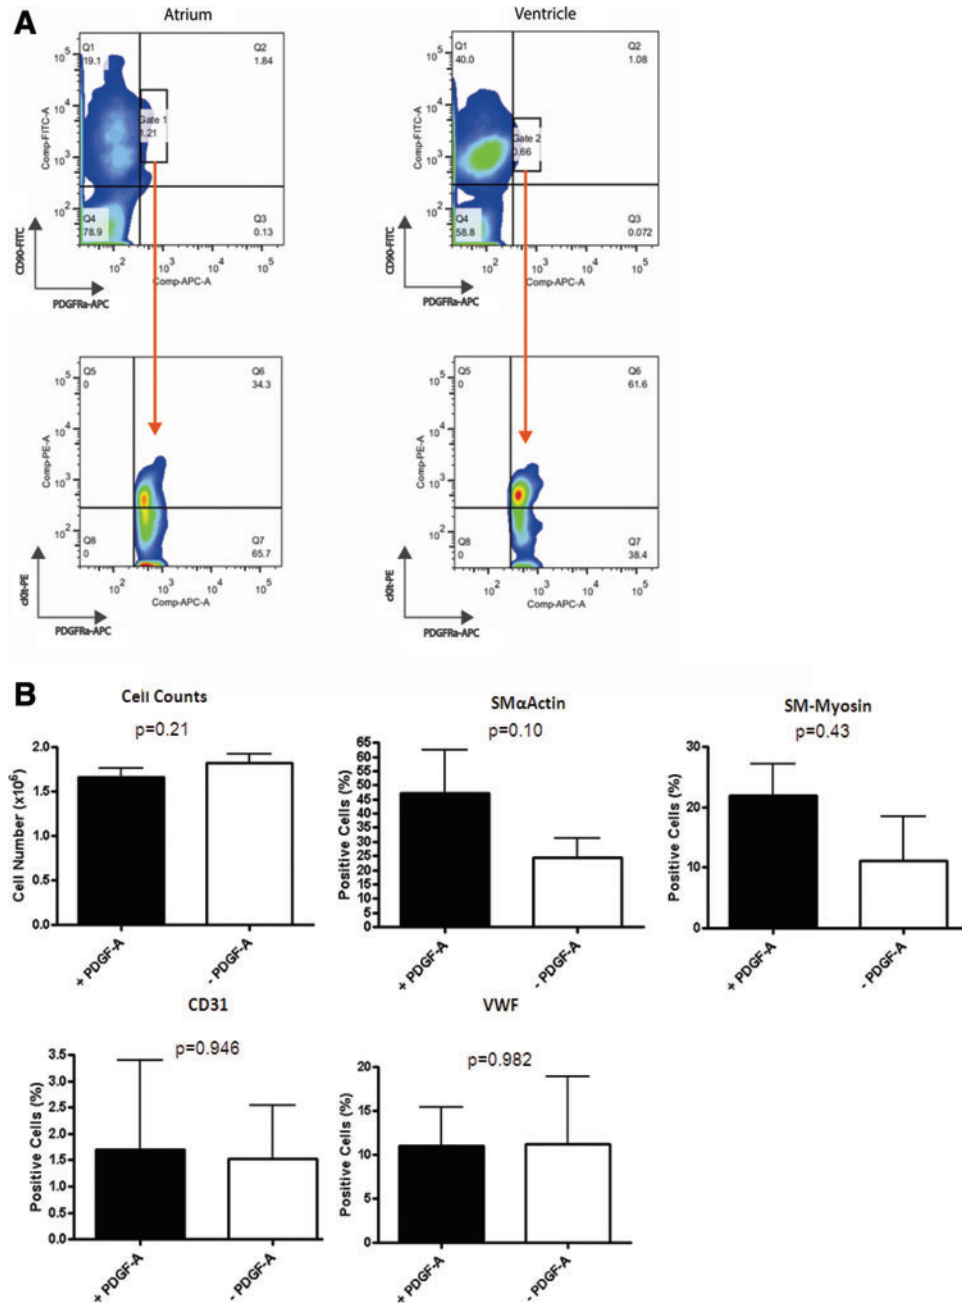

**SUPPLEMENTARY FIG. S1.** (A) Flow cytometry analysis of the atrial and ventricular cardiac nonmyocyte population of human fetal hearts. PDGFR $\alpha$ -dim cells are CD90 positive. A rare subfraction of the PDGFR $\alpha$ -expressing cells in both the atria and ventricles also express c-Kit. (B) Addition of recombinant human PDGF-A to cultured PDGFR $\alpha$ + human fetal cardiac cells. A statistically insignificant trend for differentiation toward smooth muscle phenotypes is seen. PDGFR $\alpha$ , platelet-derived growth factor- $\alpha$ ; CM, cardiomyocyte; SM, smooth muscle; EC, endothelial cell; vWF, von Willebrand factor.
